# Supplementary material for: Genetic Alterations in Members of the Proteasome 26S Subunit, AAA-ATPase (PSMC) Gene Family in the Light of Proteasome Inhibitor Resistance in Multiple Myeloma
Source: MDPI journal article supplement (doi:10.3390/cancers15020532), 2023-01-15
Supplement: s1 [file s1]

## Supplementary Information

**Supplemental Table S1:** Validated, somatic, non-synonymous mutations of the index patient.

| Gene          | Chr.  | Position  | Ref. Allele | Alt. Allele | VAF at NDMM | VAF at RMM | Transcript   | HGVS Coding  | Variant Classification | Polyphen Prediction |
|---------------|-------|-----------|-------------|-------------|-------------|------------|--------------|--------------|------------------------|---------------------|
| <i>SPEN</i>   | Chr1  | 16256441  | G           | C           | 1           | 0.14       | NM_015001    | p.D1236H     | disease causing        | missense            |
| <i>CC2D1B</i> | Chr1  | 52821913  | G           | A           | 0.11        | 0.26       | NM_032449    | p.Q673*      | disease causing        | nonsense            |
| <i>MARK1</i>  | Chr1  | 220826538 | G           | A           | 0.33        | 0.44       | NM_018650    | p.R611Q      | disease causing        | missense            |
| <i>HOXD12</i> | Chr2  | 176965457 | T           | G           | 0.44        | 0.25       | NM_021193    | p.V261G      | disease causing        | missense            |
| <i>CPNE4</i>  | Chr3  | 131388539 | C           | G           | 0.85        | 0.08       | NM_140808    | p.D221H      | disease causing        | missense            |
| <i>SMC4</i>   | Chr3  | 160146645 | G           | A           | 0.38        | 0.24       | NM_001002800 | p.D904N      | disease causing        | missense            |
| <i>SMC4</i>   | Chr3  | 160146654 | G           | C           | 0.4         | 0.25       | NM_001002800 | p.D907H      | disease causing        | missense            |
| <i>LRP2BP</i> | Chr4  | 186294161 | A           | C           | 0.41        | 0.2        | NM_018409    | p.L218V      | disease causing        | missense            |
| <i>PSMC2</i>  | Chr7  | 103008485 | A           | C           | 0           | 0.3        | NM_002803    | p.Y429S      | disease causing        | missense            |
| <i>FOXM1</i>  | Chr12 | 2977838   | T           | G           | 0.57        | 0.26       | NM_021953    | p.Q246P      | disease causing        | missense            |
| <i>AMHR2</i>  | Chr12 | 53817719  | A           | G           | 0           | 0.02       | NM_020547    | p.start lost | disease causing        | missense            |
| <i>LRFN5</i>  | Chr14 | 42356135  | G           | A           | 0.42        | 0.2        | NM_152447    | p.A103T      | disease causing        | missense            |
| <i>IREB2</i>  | Chr15 | 78786522  | A           | T           | 0.68        | 0          | NM_004136    | p.E837D      | disease causing        | missense            |
| <i>STXBP4</i> | Chr17 | 53150307  | T           | C           | 0.4         | 0.39       | NM_178509    | p.I353T      | disease causing        | missense            |
| <i>MAST3</i>  | Chr19 | 18218419  | G           | A           | 0.29        | 0.16       | NM_015016    | p.R21Q       | disease causing        | missense            |
| <i>SAMHD1</i> | Chr20 | 35526338  | A           | C           | 0.62        | 0.15       | NM_015474    | p.F545V      | disease causing        | missense            |

Abbreviations: Alt, alternative; Chr, chromosome; HGVS, Human Genome Variation Society; NDMM, newly diagnosed multiple myeloma; Ref, reference; RMM, relapsed multiple myeloma; VAF, variant allele fraction.

**Supplemental Table S2:** PSMC single nucleotide variants in the following published datasets: Samur et al. [37]; Haertle et al. [16]; Bolli et al. [34], Lohr et al. [33], CoMMpass and Giesen et al. [35] and their potential structural impact (PDB 5GJQ).

| Disease state | Cohort         | Gene  | NCBI-Build | Chr.  | Position  | Variant Classification | Ref. Allele | Alt. Allele | Patient ID    | HGVS coding | HGVS protein        | Structural Prediction |
|---------------|----------------|-------|------------|-------|-----------|------------------------|-------------|-------------|---------------|-------------|---------------------|-----------------------|
| NDMM          | Samur et al.   | PSMC1 | GRCh38     | chr14 | 90269508  | frameshift_del         | A           | -           | 11845_D       | c.995del    | p.Asn332ThrfsTer322 | 1                     |
| NDMM          | Samur et al.   | PSMC2 | GRCh38     | chr7  | 103353946 | missense_var           | G           | T           | 12339         | c.96G>T     | p.Leu32Phe          | 6                     |
| NDMM          | Samur et al.   | PSMC5 | GRCh38     | chr17 | 63830403  | missense_var           | G           | A           | 13835         | c.454G>A    | p.Gly152Ser         | 1                     |
| NDMM          | Samur et al.   | PSMC5 | GRCh38     | chr17 | 63829525  | missense_var           | G           | A           | 901-016-B     | c.128G>A    | p.Arg43Gln          | 2                     |
| NDMM          | Samur et al.   | PSMC3 | GRCh38     | chr11 | 47426260  | missense_var           | A           | T           | 934-002-B     | c.20T>A     | p.Ile7Asn           | 6                     |
| NDMM          | Haertle et al. | PSMC1 | GRCh37     | chr14 | 90730114  | missense_var           | G           | C           | MLL_193429    | c.388G>C    | p.Glu130Gln         | 4                     |
| NDMM          | Bolli et al.   | PSMC2 | GRCh37     | chr7  | 103008052 | missense_var           | C           | T           | PD5883        | c.1037C>T   | p.Pro346Leu         | 1                     |
| NDMM          | Bolli et al.   | PSMC5 | GRCh37     | chr17 | 61907763  | missense_var           | G           | C           | PD5874        | c.454G>C    | p.Gly152Arg         | 1                     |
| NDMM          | Bolli et al.   | PSMC4 | GRCh37     | chr19 | 40485741  | missense_var           | G           | T           | PD5865        | c.691G>T    | p.Val231Leu         | 2                     |
| NDMM          | Lohr et al.    | PSMC5 | GRCh36     | chr17 | 59261495  | missense_var           | G           | A           | MM-0639-Tumor | c.454G>A    | p.Gly152Ser         | 1                     |
| NDMM          | Lohr et al.    | PSMC6 | GRCh36     | chr14 | 52241739  | 5'flank                | T           | A           | MM-0376-Tumor | -           | -                   | 7                     |
| NDMM          | Lohr et al.    | PSMC4 | GRCh37     | chr19 | 45177727  | frameshift_del         | A           | -           | MM-0606-Tumor | c.837delA   | p.Thr279fs          | 2,3,4                 |
| NDMM          | CoMMpass       | PSMC5 | GRCh38     | chr17 | 63830403  | missense_var           | G           | A           | MMRF_1502     | c.454G>A    | p.Gly152Ser         | 1                     |
| NDMM          | CoMMpass       | PSMC4 | GRCh38     | chr19 | 39972381  | missense_var           | G           | C           | MMRF_1602     | c.148G>C    | p.Glu50Gln          | 5                     |
| NDMM          | CoMMpass       | PSMC1 | GRCh38     | chr14 | 90268235  | missense_var           | T           | G           | MMRF_1614     | c.703T>G    | p.Leu235Val         | 3                     |
| NDMM          | CoMMpass       | PSMC1 | GRCh38     | chr14 | 90263768  | missense_var           | C           | T           | MMRF_1640     | c.386C>T    | p.Ser129Leu         | 4                     |
| NDMM          | CoMMpass       | PSMC5 | GRCh38     | chr17 | 63829897  | missense_var           | C           | G           | MMRF_1886     | c.212C>G    | p.Ser71Cys          | 2,4                   |
| NDMM          | CoMMpass       | PSMC1 | GRCh38     | chr14 | 90260126  | missense_var           | G           | C           | MMRF_1965     | c.69G>C     | p.Lys23Asn          | 6                     |
| NDMM          | CoMMpass       | PSMC2 | GRCh38     | chr7  | 103367586 | missense_var           | A           | C           | MMRF_2245     | c.1018A>C   | p.Lys340Gln         | 5                     |
| NDMM          | CoMMpass       | PSMC1 | GRCh38     | chr14 | 90270213  | missense_var           | A           | C           | MMRF_2293     | c.1049A>C   | p.Lys350Thr         | 2,3                   |
| NDMM          | CoMMpass       | PSMC5 | GRCh38     | chr17 | 63830178  | missense_var           | G           | A           | MMRF_2300     | c.310G>A    | p.Asp104Asn         | 5                     |
| NDMM          | CoMMpass       | PSMC1 | GRCh38     | chr14 | 90269468  | missense_var           | G           | A           | MMRF_2595     | c.953G>A    | p.Gly318Glu         | 1                     |
| NDMM          | CoMMpass       | PSMC5 | GRCh38     | chr17 | 63831770  | missense_var           | T           | C           | MMRF_2626     | c.1127T>C   | p.Val376Ala         | 2                     |
| NDMM          | CoMMpass       | PSMC5 | GRCh38     | chr17 | 63831351  | missense_var           | G           | C           | MMRF_2699     | c.895G>C    | p.Asp299His         | 5                     |
| NDMM          | CoMMpass       | PSMC5 | GRCh38     | chr17 | 63831954  | missense_var           | G           | T           | MMRF_2699     | c.1206G>T   | p.Lys402Asn         | 6                     |
| NDMM          | CoMMpass       | PSMC5 | GRCh38     | chr17 | 63831962  | missense_var           | G           | T           | MMRF_2699     | c.1214G>T   | p.Trp405Leu         | 6                     |
| NDMM          | CoMMpass       | PSMC5 | GRCh38     | chr17 | 63831528  | missense_var           | T           | C           | MMRF_2714     | c.992T>C    | p.Ile331Thr         | 1                     |

|      |                      |       |        |       |           |                |    |   |                   |           |             |     |
|------|----------------------|-------|--------|-------|-----------|----------------|----|---|-------------------|-----------|-------------|-----|
| NDMM | CoMMpass             | PSMC2 | GRCh38 | chr7  | 103362710 | missense_var   | T  | G | MMRF_2913         | c.447T>G  | p.Ile149Met | 3   |
| NDMM | CoMMpass             | PSMC4 | GRCh38 | chr19 | 39974303  | missense_var   | A  | T | MMRF_2916         | c.332A>T  | p.Tyr111Phe | 2,4 |
| PMM  | Haertle et al.       | PSMC6 | GRCh37 | chr14 | 53173969  | missense_var   | A  | T | MLL_165899        | c.74A>T   | p.Asp25Val  | 7   |
| PMM  | Lohr et al.          | PSMC3 | GRCh36 | chr11 | 47403280  | missense_var   | T  | G | MM-0332-Tumor     | c.253A>C  | p.Thr85Pro  | 3,4 |
| PMM  | Lohr et al.          | PSMC6 | GRCh36 | chr14 | 52254707  | missense_var   | G  | A | MM-0308-Tumor     | c.602G>A  | p.Ser201Asn | 2,3 |
| PMM  | Giesen et al.        | PSMC2 | GRCh37 | chr7  | 103008256 | missense_var   | G  | T | H2                | c.1144G>T | p.Gly382Cys | 1   |
| PMM  | <b>Index patient</b> | PSMC2 | GRCh37 | chr7  | 103008485 | missense_var   | A  | C | Santander patient | c.1286A>C | p.Tyr429Ser | 2   |
| PMM  | CoMMpass             | PSMC2 | GRCh38 | chr7  | 103367418 | missense_var   | C  | T | MMRF_1179         | c.850C>T  | p.Arg284Cys | 2,3 |
| PMM  | CoMMpass             | PSMC5 | GRCh38 | chr17 | 63831420  | missense_var   | G  | C | MMRF_1193         | c.964G>C  | p.Glu322Gln | 5   |
| PMM  | CoMMpass             | PSMC6 | GRCh38 | chr14 | 52708515  | frameshift_del | AG | A | MMRF_2531         | c.241delG | p.Glu81fs   | 7   |

Abbreviations: Alt, alternative; Chr, chromosome; HGVS, Human Genome Variation Society; ID, identifier; NCBI, National Center for Biotechnology Information; Ref, reference

- 1: mutation is located within the ADP/ATP pocket
- 2: mutation perturbs the interaction with other PSMC protomer(s)
- 3: mutation affects the intrinsic conformation of the respective subunit
- 4: mutation in the central core of the PSMC ATPase complex
- 5: mutation is not conclusive
- 6: mutation is located outside of the PDB 5GJQ
- 7: N.A.

**Supplemental Table S3: Frequency of *PSMC* SNVs in different NDMM and PMM cohorts.**

Samur et al. [37]; Haertle et al. [16]; Bolli et al. [34], Lohr et al. [33], CoMMpass and Giesen et al. [35].

|                            | NDMM         |                 |                |                   |                 |                            |               | PMM          |                 |                     |                |                  |                   |                       |             |
|----------------------------|--------------|-----------------|----------------|-------------------|-----------------|----------------------------|---------------|--------------|-----------------|---------------------|----------------|------------------|-------------------|-----------------------|-------------|
| Protea-<br>some<br>Subunit | CoMM<br>pass | Bolli<br>et al. | Lohr<br>et al. | Haertle<br>et al. | Samur<br>et al. | Total<br>Count<br>Baseline | %<br>Baseline | CoMM<br>pass | Bolli<br>et al. | Ziccheddu<br>et al. | Lohr<br>et al. | Giesen<br>et al. | Haertle<br>et al. | Total<br>Count<br>PMM | %<br>PMM    |
| <b>n</b>                   | 948          | 67              | 85             | 37                | 362             | <b>1499</b>                | <b>1499</b>   | 161          | 15              | 40                  | 100            | 38               | 93                | <b>447</b>            | <b>447</b>  |
| <i>PSMC1</i>               | 5            | 0               | 0              | 1                 | 1               | <b>7</b>                   | <b>0.47</b>   | 0            | 0               | 0                   | 0              | 0                | 0                 | <b>0</b>              | <b>0.00</b> |
| <i>PSMC2</i>               | 2            | 1               | 0              | 0                 | 1               | <b>4</b>                   | <b>0.27</b>   | 1            | 0               | 0                   | 0              | 1                | 0                 | <b>2</b>              | <b>0.45</b> |
| <i>PSMC3</i>               | 0            | 0               | 0              | 0                 | 1               | <b>1</b>                   | <b>0.07</b>   | 0            | 0               | 0                   | 1              | 0                | 0                 | <b>1</b>              | <b>0.22</b> |
| <i>PSMC4</i>               | 2            | 1               | 1              | 0                 | 0               | <b>4</b>                   | <b>0.27</b>   | 0            | 0               | 0                   | 0              | 0                | 0                 | <b>0</b>              | <b>0.00</b> |
| <i>PSMC5</i>               | 8            | 1               | 1              | 0                 | 2               | <b>10</b>                  | <b>0.67</b>   | 1            | 0               | 0                   | 0              | 0                | 0                 | <b>1</b>              | <b>0.22</b> |
| <i>PSMC6</i>               | 0            | 0               | 1              | 0                 | 0               | <b>1</b>                   | <b>0.07</b>   | 1            | 0               | 0                   | 1              | 0                | 1                 | <b>3</b>              | <b>0.67</b> |
| <b>Total</b>               | 17           | 3               | 3              | 1                 | 5               | <b>27</b>                  | <b>1.80</b>   | 3            | 0               | 0                   | 2              | 1                | 1                 | <b>7</b>              | <b>1.57</b> |

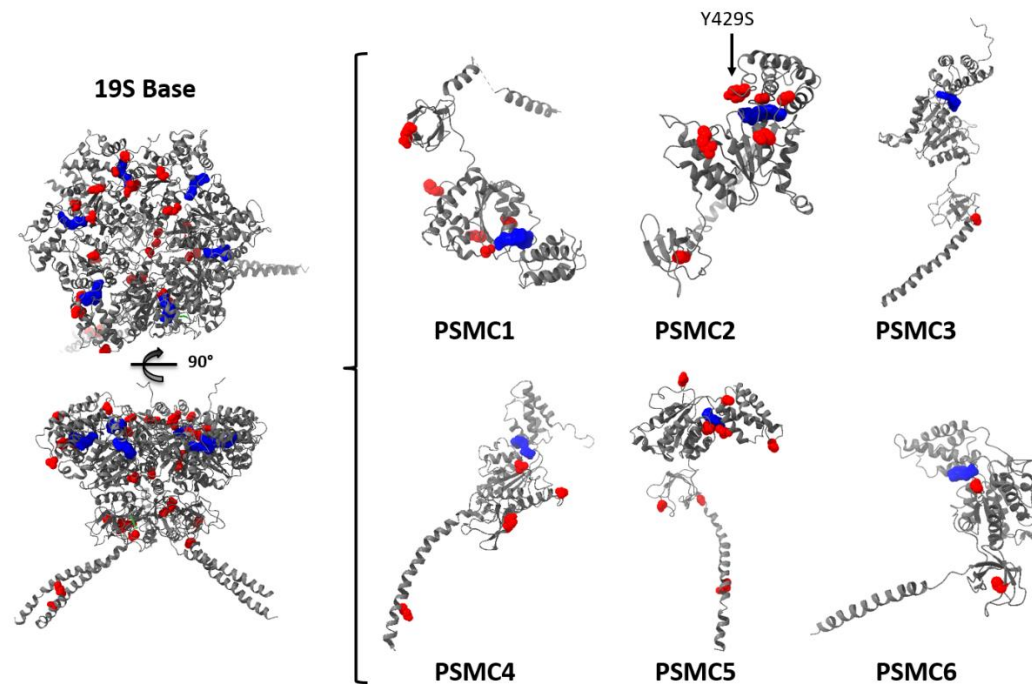

**Supplemental Figure S1: Distribution of mutations in the PSMC subunits of the 19S Base AAA ATPase protomer.**

Electron Microscopy (EM) structure of the 19S Base of the 26 proteasome (PDB 5GJR [39]) analyzed with the ChimeraX. The backbone of the protomer is displayed as a ribbon diagram. In the projections, the mutations are shown in red as 3D spheres and ADP in blue. Mutations cluster in proximity to the ADP/ATP binding pocket and other areas responsible for proper folding and functioning of the whole complex. The PSMC2 Y429S mutation of the index patients is indicated.

## PSMC5

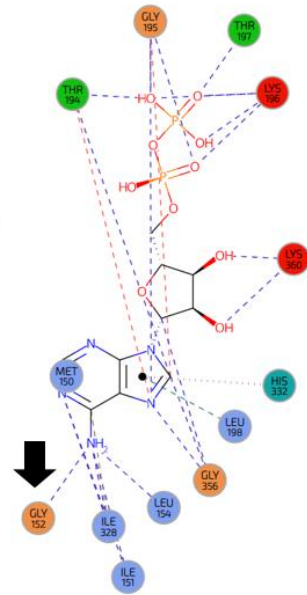

### Supplemental Figure S2: Map of the amino acids in direct interaction with the ADP shown for PSMC5.

The ADP interaction maps with the different residues of the PSMC5 protomer was taken from the European Protein Data Bank (PDBE) and deposited by the authors of Huang et al. PDB 5GJQ [39]. Individual amino acids are indicated in circles; the color is related to the charge of the side chain. The black arrow highlights the PSMC5 Glycine 152, which was substituted to a serine in three independent patients and to an arginine in a fourth patient. Consequently, it might represent a mutational hotspot.

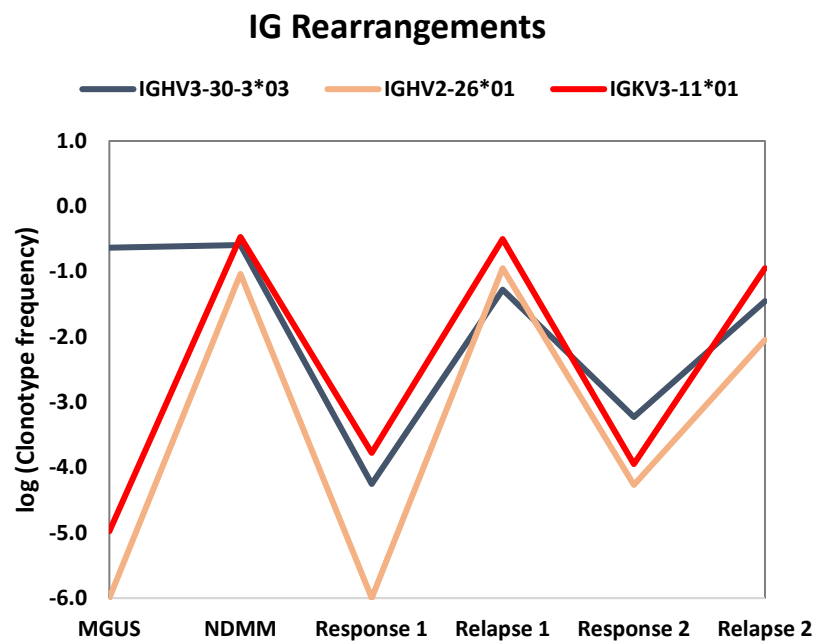

**Supplemental Figure S3: Follow-up of the index patient by using IG rearrangements analysis including MRD.**

In the first complete remission (response 1) IGHV3-30-3\*03 and IGKV3-11\*01 were detected, IGHV2-26\*01 could not be detected. In the second complete remission (response 2) all 3 rearrangements were identified.

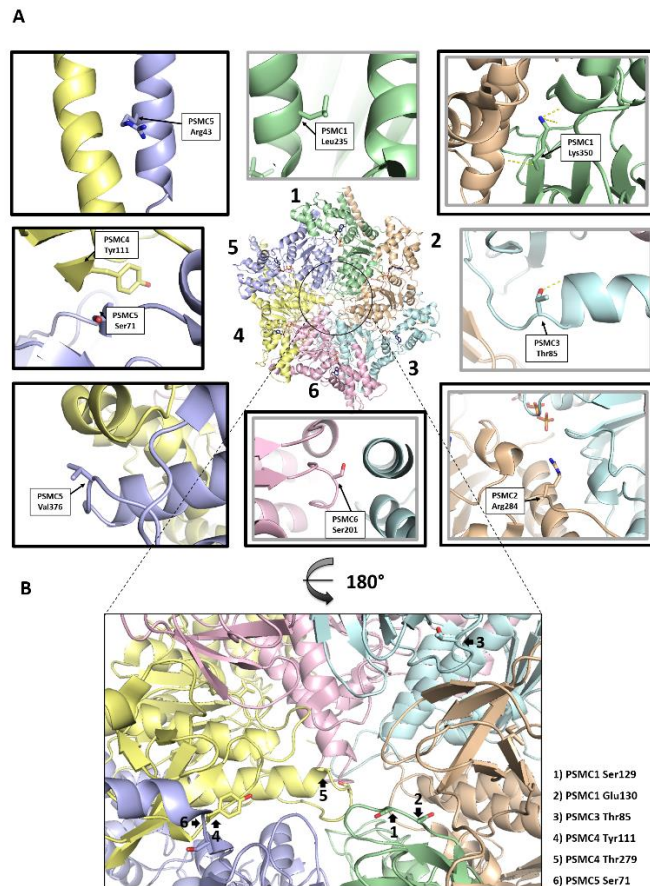

**Supplemental Figure S4: Examples of amino acids that provoke intrinsic conformational changes or disturb the interactions within different protomers when mutated and zoom into the core of the PSMC complex.**

(A) The different PSMC subunits are shown in different colors: PSMC1, 2, 3, 4, 5, and 6 in green, brown, blue, yellow, purple, and pink. The backbone is represented as a ribbon diagram, and the endogenous amino acid mutated in MM patients are shown as wireframe sticks. Those where mutations might affect the intrinsic conformation of the respective subunits are indicated by a grey frame, whereas such that might impact the proper interaction between different PSMC subunits are framed in black. (B) Mutated amino acids in the core of the PSMC complex through which the substrates are introduced into the catalytic 20S complex.



## References

16. Haertle, L.; Barrio, S.; Munawar, U.; Han, S.; Zhou, X.; Simicek, M.; Vogt, C.; Truger, M.; Alonso Fernandez, R.; Steinhardt, M.; et al. Single Nucleotide Variants and Epimutations Induce Proteasome Inhibitor Resistance in Multiple Myeloma. *Clin. Cancer Res.* 2023, 29, 279 – 288.
33. Lohr, J.G.; Stojanov, P.; Carter, S.L.; Cruz-Gordillo, P.; Lawrence, M.S.; Auclair, D.; Sougnez, C.; Knoechel, B.; Gould, J.; Saksena, G.; et al. Widespread genetic heterogeneity in multiple myeloma: Implications for targeted therapy. *Cancer Cell* 2014, 25, 91 – 101.
34. Bolli, N.; Avet-Loiseau, H.; Wedge, D.C.; Van Loo, P.; Alexandrov, L.B.; Martincorena, I.; Dawson, K.J.; Iorio, F.; Nik-Zainal, S.; Bignell, G.R.; et al. Heterogeneity of genomic evolution and mutational profiles in multiple myeloma. *Nat. Commun.* 2014, 5, 2997.
35. Giesen, N.; Paramasivam, N.; Toprak, U.H.; Huebschmann, D.; Xu, J.; Uhrig, S.; Samur, M.; Bahr, S.; Frohlich, M.; Mughal, S.S.; et al. Comprehensive genomic analysis of refractory multiple myeloma reveals a complex mutational landscape associated with drug resistance and novel therapeutic vulnerabilities. *Haematologica* 2022, 107, 1891 – 1901.
37. Samur, M.K.; Aktas Samur, A.; Fulciniti, M.; Szalat, R.; Han, T.; Shammas, M.; Richardson, P.; Magrangeas, F.; Minvielle, S.; Corre, J.; et al. Genome-Wide Somatic Alterations in Multiple Myeloma Reveal a Superior Outcome Group. *J. Clin. Oncol.* 2020, 38, 3107 – 3118.
39. Leipe, D.D.; Koonin, E.V.; Aravind, L. Evolution and classification of P-loop kinases and related proteins. *J. Mol. Biol.* 2003, 333, 781 – 815.
